# Supplementary material for: Effects of glyphosate exposure on intestinal microbiota, metabolism and microstructure: a systematic review
Source: Royal Society of Chemistry journal article supplement (doi:10.1039/d4fo00660g), 2024-01-01
Supplement: d4fo00660g2.pdf [file d4fo00660g2.pdf]

**Table S1.** Detailed search strategy with search filters and number of studies recovered in electronic databases.

| <i>PubMed-MEDLINE – Search filters</i>                                                                                                                                                                                                                                                                                                                                                                                                                                                                                                           | <i>Records</i> |
|--------------------------------------------------------------------------------------------------------------------------------------------------------------------------------------------------------------------------------------------------------------------------------------------------------------------------------------------------------------------------------------------------------------------------------------------------------------------------------------------------------------------------------------------------|----------------|
| <b>#1 Herbicide:</b> (“glyphosate”[MeSH Terms] OR “glyceryl glyphosate”[MeSH Terms] OR “N-(phosphonomethyl)glycine”[TIAB] OR “Glyphosate”[TIAB] OR “glyphosate, monoammonium salt”[TIAB] OR “Roundup”[TIAB])                                                                                                                                                                                                                                                                                                                                     | 7582           |
| <b>#2 Biological target:</b> (“gut microbiome”[TIAB] OR “gut microbiomes”[TIAB] OR “microbiome, gut”[TIAB] OR “gut microbiota”[TIAB] OR “Microbiota[MeSH Terms]” OR “microbiota, gut”[TIAB] OR “intestinal microbiome”[TIAB] OR “intestinal microbiomes”[TIAB] OR “microbiome, intestinal”[TIAB] OR “intestinal microbiota”[TIAB] OR “intestinal microbiotas”[TIAB] OR “microbiota, intestinal”[TIAB])                                                                                                                                           | 105000         |
| <b>#3 Combined search:</b> #1 AND #2                                                                                                                                                                                                                                                                                                                                                                                                                                                                                                             | 490            |
| <i>SCOPUS – Search filters</i>                                                                                                                                                                                                                                                                                                                                                                                                                                                                                                                   | <i>Records</i> |
| <b>#1 Herbicide:</b> TITLE-ABS-KEY(“glyphosate”) OR TITLE-ABS-KEY(“glyceryl glyphosate”) OR TITLE-ABS-KEY(“N-(phosphonomethyl)glycine”) OR TITLE-ABS-KEY(“Glyphosate”) OR TITLE-ABS-KEY(“glyphosate, monoammonium salt”) OR TITLE-ABS-KEY(“Roundup”)                                                                                                                                                                                                                                                                                             | 17283          |
| <b>#2 Biological target:</b> (TITLE-ABS-KEY(“gut microbiome”) OR TITLE-ABS-KEY(“gut microbiomes”) OR TITLE-ABS-KEY(“microbiome, gut”) OR TITLE-ABS-KEY(“gut microbiota”) OR TITLE-ABS-KEY(“gut microbiotas”) OR TITLE-ABS-KEY(“microbiota, gut”) OR TITLE-ABS-KEY(“Microbiota”) OR TITLE-ABS-KEY(“intestinal microbiome”) OR TITLE-ABS-KEY(“intestinal microbiomes”) OR TITLE-ABS-KEY(“microbiome, intestinal”) OR TITLE-ABS-KEY(“intestinal microbiota”) OR TITLE-ABS-KEY(“intestinal microbiotas”) OR TITLE-ABS-KEY(“microbiota, intestinal”)) | 139981         |
| <b>#3 Combined search:</b> #1 AND #2                                                                                                                                                                                                                                                                                                                                                                                                                                                                                                             | 182            |

Database search was concluded on February Day, 2022 at 10:46 a.m.

**Table S1 (continuation).** Detailed search strategy with search filters and number of studies recovered in electronic databases.

| <i><b>WEB OF SCIENCE – Search filters</b></i>                                                                                                                                                                                                                                                                                                            | <i><b>Records</b></i> |
|----------------------------------------------------------------------------------------------------------------------------------------------------------------------------------------------------------------------------------------------------------------------------------------------------------------------------------------------------------|-----------------------|
| <b>#1 Herbicide:</b> TS=glyphosate OR TS=glyceryl glyphosate OR TS=N-(phosphonomethyl)glycine OR TS=Glyphosate OR TS=glyphosate, monoammonium salt OR TS=Roundup                                                                                                                                                                                         | 16747                 |
| <b>#2 Biological target:</b> TS=Gut microbiome OR TS=Gut microbiomes OR TS=Microbiome, gut OR TS=Gut microbiota OR TS=Gut microbiotas OR TS=Microbiota, gut OR TS=Intestinal microbiome OR TS=Microbiota OR TS=Intestinal microbiomes OR TS=Microbiome, intestinal OR TS=Intestinal microbiota OR TS=Intestinal microbiotas OR TS=Microbiota, intestinal | 146112                |
| <b>#3 Combined search:</b> #1 AND #2                                                                                                                                                                                                                                                                                                                     | 158                   |

Database search was concluded on February Day, 2022 at 10:46 a.m
