# Supplementary material for: Effects of glyphosate exposure on intestinal microbiota, metabolism and microstructure: a systematic review
Source: Royal Society of Chemistry journal article supplement (doi:10.1039/d4fo00660g), 2024-01-01
Supplement: d4fo00660g3.pdf [file d4fo00660g3.pdf]

**Table S2.** General characteristics of all *in vivo* preclinical studies evaluating the effect of Glyphosate on the intestinal microbiota.

| Author                         | Country     | Animal                              | Age      | Sex | Formulation-Glyphosate | Administration route | Dose                             | Exposition time |
|--------------------------------|-------------|-------------------------------------|----------|-----|------------------------|----------------------|----------------------------------|-----------------|
| ALMASRI <i>et al.</i> 2022     | France      | Honey bees<br><i>Apis mellifera</i> | (-)      | (-) | (-)                    | (-)                  | 0,1 µg/L                         | (-)             |
| BREDE <i>et al.</i> 2022       | Germany     | Cows<br><i>Holstein-Frisia</i>      | (-)      | F   | Roundup®               | Oral                 | 0,1 mg/L; 1,0 mg/L<br>or 10 mg/L | 9 days          |
| CHEN <i>et al.</i> 2022        | China       | Fish<br><i>Cyprinus carpio</i>      | (-)      | (-) | GLY                    | (-)                  | 0; 5 or 15 mg/L                  | 60 days         |
| DEL CASTILO <i>et al.</i> 2022 | Brazil      | Swiss mice<br><i>Mus musculus</i>   | 10 weeks | (-) | Roundup®               | (-)                  | 0,075% w/v                       | (-)             |
| LIU <i>et al.</i> 2022         | China       | Rats<br>(-)                         | (-)      | M   | GLY                    | Oral                 | 0; 2 and 50 mg/kg                | 2 months        |
| MOTTA <i>et al.</i> 2022       | USA         | Honey bees<br><i>Apis mellifera</i> | (-)      | M   | GLY                    | Oral                 | 0,1 or 1,0 mM                    | 5 days          |
| TLAIS <i>et al.</i> 2022       | Italy       | Honey bees<br><i>Apis mellifera</i> | (-)      | (-) | Roundup®               | Oral                 | 3,0 ml/L                         | 24 h            |
| BILLENKAMP <i>et al.</i> 2021  | Germany     | Cows<br>(-)                         | (-)      | (-) | (-)                    | (-)                  | 56,2 mmol/L                      | 16 weeks        |
| CASTELLI <i>et al.</i> 2021    | Switzerland | Honey bees<br><i>Apis mellifera</i> | (-)      | M   | GLY                    | Oral                 | 10 mg/L                          | 7 days          |
| DING <i>et al.</i> 2021        | China       | Zebrafish<br><i>Danio rerio</i>     | 6 months | (-) | GLY                    | (-)                  | 3,5 mg/L                         | 21 days         |

|                                  |                |                        |                                                                                        |                         |         |                  |      |                        |                    |
|----------------------------------|----------------|------------------------|----------------------------------------------------------------------------------------|-------------------------|---------|------------------|------|------------------------|--------------------|
| <b>HU et al. 2021</b>            | USA            | Rats                   | (-)                                                                                    | 0 day                   | F and M | GBH              | (-)  | 1,75 mg/kg             | 90 days            |
| <b>MESNAGE et al. 2021</b>       | United Kingdom | Rats                   | <i>Sprague Dawley</i>                                                                  | 8 weeks                 | F       | (-)              | (-)  | 0; 5; 50 and 175 mg/kg | 90 days            |
| <b>OWAGBORIAYE, et al. 2021</b>  | Nigeria        | Earthworms             | <i>Alma millsoni</i> ,<br><i>Eudrilus eugeniae</i><br>and <i>Libyodrilus violaceus</i> | (-)                     | (-)     | Roundup®         | (-)  | 7,20 g/L               | 8 weeks            |
| <b>GÓMEZ-GALLEGO et al. 2020</b> | Finland        | Colorado potato beetle | <i>Leptinotarsa decemlineata</i>                                                       | (-)                     | (-)     | Roundup®         | (-)  | (-)                    | 9 days             |
| <b>IORI et al. 2020</b>          | Italy          | Mussel                 | <i>Mytilus galloprovincialis</i>                                                       | (-)                     | (-)     | GLY              | (-)  | 100 µg/L               | 7 and 21 days      |
| <b>KRAUSE et al. 2020</b>        | Germany        | Pigs                   | (-)                                                                                    | (-)                     | (-)     | Roundup® LB plus | Oral | 10 µg/mL               | (-)                |
| <b>MOTTA et al. 2020</b>         | USA            | Honey bees             | <i>Apis mellifera</i>                                                                  | (-)                     | (-)     | Roundup®         | (-)  | 1,0 mM                 | 5 days             |
| <b>MOTTA AND MORAN, 2020</b>     | USA            | Honey bees             | <i>Apis mellifera</i>                                                                  | 1-day-old and 5-day-old | M       | GLY              | Oral | 1,691 or 1,375 mg/L    | 5 to 20 days       |
| <b>RUUSKANEN et al. 2020</b>     | Finland        | Japanese quail         | <i>Coturnix japonica</i>                                                               | (-)                     | F and M | Roundup®         | Oral | 160 mg/kg              | 10 days - 52 weeks |
| <b>SONG et al. 2020</b>          | China          | Chinese mitten crab    | <i>Eriocheir sinensis</i>                                                              | (-)                     | (-)     | GLY              | Oral | 48,945 mg/L            | 14 days            |
| <b>SUPPA et al. 2020</b>         | Italy          | Water flea             | <i>Daphnia</i>                                                                         | (-)                     | (-)     | Roundup®         | (-)  | 1 mg/L                 | (-)                |

|                               |         |                     |                               |         |         |          |      |                                |                             |
|-------------------------------|---------|---------------------|-------------------------------|---------|---------|----------|------|--------------------------------|-----------------------------|
| <b>TANG et al. 2020</b>       | China   | Rats                | <i>Sprague Dawley</i>         | 8 weeks | M       | GLY      | Oral | 0; 5; 50 and 500 mg/kg         | 35 days                     |
| <b>BILAN et al. 2019</b>      | Ukraine | Rats                | (-)                           | (-)     | M       | GLY      | Oral | (-)                            | 42 days                     |
| <b>BLOT et al. 2019</b>       | USA     | Honey bees          | <i>Apis Mellifera</i>         | (-)     | M       | GLY      | Oral | 0,21 or 1,08 g/kg              | 15 days (Summer and Winter) |
| <b>BOTE et al. 2019</b>       | Germany | Cows                | <i>Holstein-Frisia</i>        | (-)     | F       | GLY      | Oral | 360 g/L                        | 7 days                      |
| <b>DECHARTRES et al. 2019</b> | France  | Rats                | (-)                           | (-)     | (-)     | GLY      | (-)  | 5 mg/kg                        | 5 weeks                     |
| <b>MESNAGE et al. 2019</b>    | France  | Rats                | <i>Sprague-Dawley</i>         | 8 weeks | (-)     | GBH      | (-)  | 0,5; 50 and 175 mg/kg          | 6 months                    |
| <b>PÖPPE et al. 2019</b>      | Germany | Swine and poultry   | (-)                           | (-)     | (-)     | GLY      | Oral | 1,25 mg/mL                     | 16 h                        |
| <b>YANG et al. 2019</b>       | China   | Chinese mitten crab | <i>Eriocheir sinensis</i>     | (-)     | (-)     | GLY      | Oral | 48,95 mg/L                     | 7 days                      |
| <b>AITBALI et al. 2018</b>    | Morocco | Swiss mice          | <i>Mus musculus</i>           | 4 weeks | M       | Roundup® | Oral | 250 mg/kg or 500 mg/kg         | 6 and 12 weeks              |
| <b>DAI et al. 2018</b>        | China   | Honey bees          | <i>Apis mellifera</i>         | (-)     | M       | GLY      | Oral | 0,8; 4 e 20 mg/L               | 5 days                      |
| <b>KITTLE et al. 2018</b>     | USA     | Green turtles       | <i>Cheloniemydas Linnaeus</i> | (-)     | (-)     | GLY      | (-)  | $1,76 \times 10^{-3}$ g/L      | 3 weeks                     |
| <b>LOZANO et al. 2018</b>     | France  | Rats                | <i>Sprague-Dawley</i>         | (-)     | F and M | Roundup® | Oral | 0,1 ppb; 400 ppm and 5.000 ppm | 673 days                    |

|                              |         |                           |                                     |             |         |          |      |                            |         |
|------------------------------|---------|---------------------------|-------------------------------------|-------------|---------|----------|------|----------------------------|---------|
| <b>MADISON et al. 2018</b>   | USA     | Turtle                    | <i>Graptemys pseudogeographic a</i> | (-)         | F       | Roundup® | Oral | 10 µg/L                    | 72 h    |
| <b>MAO et al. 2018</b>       | USA     | Rats                      | <i>Sprague Dawley</i>               | (-)         | F and M | GBH      | (-)  | 1,75 mg/kg                 | (-)     |
| <b>MOTTA et al. 2018</b>     | USA     | Honey bees                | (-)                                 | (-)         | (-)     | GLY      | Oral | 5 or 10 mg/L               | 5 days  |
| <b>NIELSEN et al. 2018</b>   | Denmark | Rats                      | <i>Sprague Dawley</i>               | 4 weeks     | M       | GLY      | Oral | 0,04 or 0,08 or 0,16 mg/mL | 3 weeks |
| <b>ACKERMANN et al. 2015</b> | Germany | Cows                      | <i>Holstein-Frisia</i>              | 4 years old | (-)     | (-)      | (-)  | 0; 1; 10 and 100 µg/ml     | 2 weeks |
| <b>KRÜGER et al. 2013</b>    | Germany | Cattle, horses, and algae | (-)                                 | (-)         | (-)     | Roundup® | Oral | (-)                        | 48h     |
| <b>SHEHATA et al. 2013</b>   | USA     | Poultry                   | (-)                                 | (-)         | (-)     | GLY      | (-)  | 450 mg/ml                  | 5 days  |

**CAPTION:** (-) Data not reported or investigated; M: male; F: female; Roundup®: Monsanto, Creve Coeur, MO, USA; GLY: glyphosate; GBH: glyphosate-based herbicides; Roundup® LB plus: 024142-60/MOT, Nordland Agrar, Süderlügüm, Germany.

**OBSERVATION:** In the case of bees, *Apis mellifera* is the male.
