# Supplementary material for: Effects of glyphosate exposure on intestinal microbiota, metabolism and microstructure: a systematic review
Source: Royal Society of Chemistry journal article supplement (doi:10.1039/d4fo00660g), 2024-01-01
Supplement: d4fo00660g4.pdf [file d4fo00660g4.pdf]

**Table S3.** Evaluation of risk of bias in studies with animal models according to the SYRCLE tool.

| Signaling questions                                                                                                                     | Studies                       |                             |                            |                                      |                           |                             |                             |                                  |
|-----------------------------------------------------------------------------------------------------------------------------------------|-------------------------------|-----------------------------|----------------------------|--------------------------------------|---------------------------|-----------------------------|-----------------------------|----------------------------------|
|                                                                                                                                         | ALMASRI<br><i>et al. 2022</i> | BREDE<br><i>et al. 2022</i> | CHEN<br><i>et al. 2022</i> | DEL<br>CASTILO<br><i>et al. 2022</i> | LIU<br><i>et al. 2022</i> | MOTTA<br><i>et al. 2022</i> | TLAIS<br><i>et al. 2022</i> | BILLENKAMP<br><i>et al. 2021</i> |
| <b>1</b> Was the allocation sequence adequately generated and applied?                                                                  | Yes                           | Yes                         | No                         | No                                   | No                        | No                          | No                          | Yes                              |
| <b>2</b> Were the groups similar at baseline?                                                                                           | Yes                           | Yes                         | Yes                        | Yes                                  | Yes                       | Yes                         | No                          | Yes                              |
| <b>3</b> Was the allocation to the different groups adequately concealed during?                                                        | Yes                           | Yes                         | Yes                        | Yes                                  | Yes                       | No                          | Yes                         | Yes                              |
| <b>4</b> Were the animals randomly housed during the experiment?                                                                        | Yes                           | No                          | Yes                        | ?                                    | Yes                       | ?                           | No                          | Yes                              |
| <b>5</b> Were the caregivers and/or investigators blinded from knowledge which intervention each animal received during the experiment? | ?                             | ?                           | ?                          | ?                                    | ?                         | ?                           | ?                           | ?                                |
| <b>6</b> Were animals selected at random for outcome assessment?                                                                        | Yes                           | No                          | Yes                        | ?                                    | Yes                       | ?                           | ?                           | Yes                              |
| <b>7</b> Was the outcome assessor blinded?                                                                                              | Yes                           | ?                           | ?                          | Yes                                  | ?                         | ?                           | ?                           | ?                                |
| <b>8</b> Were incomplete outcome data adequately addressed?                                                                             | No                            | Yes                         | No                         | No                                   | No                        | No                          | Yes                         | Yes                              |
| <b>9</b> Are reports of the study free of selective outcome reporting?                                                                  | Yes                           | Yes                         | Yes                        | Yes                                  | Yes                       | Yes                         | Yes                         | Yes                              |
| <b>10</b> Was the study apparently free of other problems that could result in high risk of bias?                                       | Yes                           | Yes                         | Yes                        | Yes                                  | Yes                       | Yes                         | Yes                         | ?                                |

Yes: low risk of bias; No: high risk of bias; ?: unclear risk of bias. It is not recommend calculating a summary score for each individual study when using this toll.

**Table S3.** Evaluation of risk of bias in studies with animal models according to the SYRCLE tool.

| Signaling questions                                                                                                              | Studies                        |                            |                          |                               |                                     |                                         |                            |                              |  |
|----------------------------------------------------------------------------------------------------------------------------------|--------------------------------|----------------------------|--------------------------|-------------------------------|-------------------------------------|-----------------------------------------|----------------------------|------------------------------|--|
|                                                                                                                                  | CASTELLI<br><i>et al. 2021</i> | DING<br><i>et al. 2021</i> | HU<br><i>et al. 2021</i> | MESNAGE<br><i>et al. 2021</i> | OWAGBORUIAYE,<br><i>et al. 2021</i> | GÓMEZ-<br>GALLEGO<br><i>et al. 2020</i> | IORI<br><i>et al. 2020</i> | KRAUSE<br><i>et al. 2020</i> |  |
| 1 Was the allocation sequence adequately generated and applied?                                                                  | Yes                            | No                         | Yes                      | Yes                           | No                                  | Yes                                     | No                         | No                           |  |
| 2 Were the groups similar at baseline?                                                                                           | Yes                            | Yes                        | Yes                      | Yes                           | No                                  | ?                                       | No                         | Yes                          |  |
| 3 Was the allocation to the different groups adequately concealed during?                                                        | Yes                            | Yes                        | Yes                      | Yes                           | Yes                                 | Yes                                     | Yes                        | Yes                          |  |
| 4 Were the animals randomly housed during the experiment?                                                                        | Yes                            | ?                          | Yes                      | Yes                           | No                                  | ?                                       | Yes                        | No                           |  |
| 5 Were the caregivers and/or investigators blinded from knowledge which intervention each animal received during the experiment? | ?                              | ?                          | ?                        | ?                             | ?                                   | ?                                       | ?                          | ?                            |  |
| 6 Were animals selected at random for outcome assessment?                                                                        | Yes                            | ?                          | Yes                      | ?                             | ?                                   | ?                                       | Yes                        | ?                            |  |
| 7 Was the outcome assessor blinded?                                                                                              | ?                              | ?                          | ?                        | ?                             | ?                                   | ?                                       | ?                          | ?                            |  |
| 8 Were incomplete outcome data adequately addressed?                                                                             | Yes                            | No                         | Yes                      | No                            | No                                  | No                                      | Yes                        | Yes                          |  |
| 9 Are reports of the study free of selective outcome reporting?                                                                  | Yes                            | Yes                        | Yes                      | Yes                           | Yes                                 | Yes                                     | Yes                        | Yes                          |  |
| 10 Was the study apparently free of other problems that could result in high risk of bias?                                       | Yes                            | Yes                        | ?                        | ?                             | Yes                                 | Yes                                     | Yes                        | Yes                          |  |

Yes: low risk of bias; No: high risk of bias; ?: unclear risk of bias. It is not recommend calculating a summary score for each individual study when using this toll.

**Table S3.** Evaluation of risk of bias in studies with animal models according to the SYRCLE tool.

| Signaling questions                                                                                                                     | Studies                        |                                |                                 |                               |                                |                               |                                |                               |
|-----------------------------------------------------------------------------------------------------------------------------------------|--------------------------------|--------------------------------|---------------------------------|-------------------------------|--------------------------------|-------------------------------|--------------------------------|-------------------------------|
|                                                                                                                                         | MOTTA<br><i>et al.</i><br>2020 | MOTTA<br>AND<br>MORAN,<br>2020 | RUUSKANEN<br><i>et al.</i> 2020 | SONG<br><i>et al.</i><br>2020 | SUPPA<br><i>et al.</i><br>2020 | TANG<br><i>et al.</i><br>2020 | BILAN<br><i>et al.</i><br>2019 | BLOT<br><i>et al.</i><br>2019 |
| <b>1</b> Was the allocation sequence adequately generated and applied?                                                                  | No                             | No                             | No                              | No                            | No                             | No                            | No                             | Yes                           |
| <b>2</b> Were the groups similar at baseline?                                                                                           | Yes                            | Yes                            | Yes                             | Yes                           | Yes                            | Yes                           | Yes                            | Yes                           |
| <b>3</b> Was the allocation to the different groups adequately concealed during?                                                        | Yes                            | Yes                            | Yes                             | Yes                           | Yes                            | ?                             | No                             | ?                             |
| <b>4</b> Were the animals randomly housed during the experiment?                                                                        | ?                              | Yes                            | Yes                             | Yes                           | Yes                            | Yes                           | Yes                            | ?                             |
| <b>5</b> Were the caregivers and/or investigators blinded from knowledge which intervention each animal received during the experiment? | No                             | ?                              | Yes                             | Yes                           | ?                              | ?                             | No                             | No                            |
| <b>6</b> Were animals selected at random for outcome assessment?                                                                        | No                             | No                             | Yes                             | Yes                           | Yes                            | Yes                           | No                             | ?                             |
| <b>7</b> Was the outcome assessor blinded?                                                                                              | ?                              | ?                              | Yes                             | ?                             | ?                              | Yes                           | No                             | No                            |
| <b>8</b> Were incomplete outcome data adequately addressed?                                                                             | No                             | No                             | No                              | Yes                           | ?                              | Yes                           | Yes                            | Yes                           |
| <b>9</b> Are reports of the study free of selective outcome reporting?                                                                  | Yes                            | Yes                            | Yes                             | Yes                           | Yes                            | Yes                           | Yes                            | Yes                           |
| <b>10</b> Was the study apparently free of other problems that could result in high risk of bias?                                       | Yes                            | Yes                            | Yes                             | Yes                           | ?                              | Yes                           | ?                              | Yes                           |

Yes: low risk of bias; No: high risk of bias; ?: unclear risk of bias. It is not recommend calculating a summary score for each individual study when using this toll.

**Table S3.** Evaluation of risk of bias in studies with animal models according to the SYRCLE tool.

| Signaling questions                                                                                                                     | Studies                       |                                  |                               |                                |                               |                                  |                              |                                 |
|-----------------------------------------------------------------------------------------------------------------------------------------|-------------------------------|----------------------------------|-------------------------------|--------------------------------|-------------------------------|----------------------------------|------------------------------|---------------------------------|
|                                                                                                                                         | BOTE<br><i>et al.</i><br>2019 | DECHARTRES<br><i>et al.</i> 2019 | MESNAGE<br><i>et al.</i> 2019 | PÖPPE<br><i>et al.</i><br>2019 | YANG<br><i>et al.</i><br>2019 | AITBALI<br><i>et al.</i><br>2018 | DAI<br><i>et al.</i><br>2018 | KITTLE<br><i>et al.</i><br>2018 |
| <b>1</b> Was the allocation sequence adequately generated and applied?                                                                  | No                            | No                               | Yes                           | No                             | No                            | No                               | No                           | No                              |
| <b>2</b> Were the groups similar at baseline?                                                                                           | Yes                           | Yes                              | Yes                           | No                             | Yes                           | Yes                              | Yes                          | ?                               |
| <b>3</b> Was the allocation to the different groups adequately concealed during?                                                        | ?                             | Yes                              | Yes                           | Yes                            | Yes                           | Yes                              | Yes                          | Yes                             |
| <b>4</b> Were the animals randomly housed during the experiment?                                                                        | ?                             | Yes                              | Yes                           | ?                              | ?                             | ?                                | Yes                          | ?                               |
| <b>5</b> Were the caregivers and/or investigators blinded from knowledge which intervention each animal received during the experiment? | ?                             | Yes                              | Yes                           | ?                              | ?                             | ?                                | ?                            | No                              |
| <b>6</b> Were animals selected at random for outcome assessment?                                                                        | ?                             | Yes                              | Yes                           | No                             | ?                             | ?                                | Yes                          | No                              |
| <b>7</b> Was the outcome assessor blinded?                                                                                              | ?                             | Yes                              | Yes                           | ?                              | ?                             | ?                                | ?                            | No                              |
| <b>8</b> Were incomplete outcome data adequately addressed?                                                                             | Yes                           | Yes                              | Yes                           | Yes                            | No                            | Yes                              | No                           | No                              |
| <b>9</b> Are reports of the study free of selective outcome reporting?                                                                  | Yes                           | Yes                              | Yes                           | Yes                            | Yes                           | Yes                              | Yes                          | Yes                             |
| <b>10</b> Was the study apparently free of other problems that could result in high risk of bias?                                       | Yes                           | Yes                              | Yes                           | Yes                            | ?                             | Yes                              | Yes                          | ?                               |

Yes: low risk of bias; No: high risk of bias; ?: unclear risk of bias. It is not recommend calculating a summary score for each individual study when using this toll.

**Table S3.** Evaluation of risk of bias in studies with animal models according to the SYRCLE tool.

| Signaling questions                                                                                                                     | Studies                      |                               |                           |                             |                               |                                 |                              |                               |
|-----------------------------------------------------------------------------------------------------------------------------------------|------------------------------|-------------------------------|---------------------------|-----------------------------|-------------------------------|---------------------------------|------------------------------|-------------------------------|
|                                                                                                                                         | LOZANO<br><i>et al. 2018</i> | MADISON<br><i>et al. 2018</i> | MAO<br><i>et al. 2018</i> | MOTTA<br><i>et al. 2018</i> | NIELSEN<br><i>et al. 2018</i> | ACKERMANN<br><i>et al. 2014</i> | KRÜGER<br><i>et al. 2013</i> | SHEHATA<br><i>et al. 2013</i> |
| <b>1</b> Was the allocation sequence adequately generated and applied?                                                                  | No                           | No                            | No                        | No                          | No                            | No                              | No                           | No                            |
| <b>2</b> Were the groups similar at baseline?                                                                                           | ?                            | Yes                           | Yes                       | Yes                         | Yes                           | Yes                             | Yes                          | No                            |
| <b>3</b> Was the allocation to the different groups adequately concealed during?                                                        | Yes                          | Yes                           | Yes                       | Yes                         | Yes                           | Yes                             | Yes                          | Yes                           |
| <b>4</b> Were the animals randomly housed during the experiment?                                                                        | ?                            | Yes                           | Yes                       | ?                           | Yes                           | No                              | ?                            | ?                             |
| <b>5</b> Were the caregivers and/or investigators blinded from knowledge which intervention each animal received during the experiment? | Yes                          | ?                             | ?                         | ?                           | ?                             | No                              | ?                            | ?                             |
| <b>6</b> Were animals selected at random for outcome assessment?                                                                        | No                           | ?                             | ?                         | ?                           | Yes                           | No                              | ?                            | No                            |
| <b>7</b> Was the outcome assessor blinded?                                                                                              | ?                            | ?                             | ?                         | ?                           | ?                             | No                              | ?                            | No                            |
| <b>8</b> Were incomplete outcome data adequately addressed?                                                                             | Yes                          | Yes                           | Yes                       | No                          | Yes                           | Yes                             | Yes                          | ?                             |
| <b>9</b> Are reports of the study free of selective outcome reporting?                                                                  | Yes                          | Yes                           | Yes                       | Yes                         | Yes                           | Yes                             | Yes                          | Yes                           |
| <b>10</b> Was the study apparently free of other problems that could result in high risk of bias?                                       | Yes                          | ?                             | Yes                       | ?                           | Yes                           | ?                               | ?                            | ?                             |

Yes: low risk of bias; No: high risk of bias; ?: unclear risk of bias. It is not recommend calculating a summary score for each individual study when using this toll.

| Study                                 | Selection bias 1 | Selection bias 2 | Selection bias 3 | Performance bias 1 | Performance bias 2 | Detection bias 1 | Detection bias 2 | Attrition bias | Reporting bias | Other potential bias |
|---------------------------------------|------------------|------------------|------------------|--------------------|--------------------|------------------|------------------|----------------|----------------|----------------------|
| <b>ALMASRI <i>et al.</i> 2022</b>     | ✓                | ✓                | ✓                | ✓                  | X                  | ✓                | ✓                | X              | ✓              | ✓                    |
| <b>BREDE <i>et al.</i> 2022</b>       | ✓                | ✓                | ✓                | X                  | X                  | X                | ?                | ✓              | ✓              | ✓                    |
| <b>CHEN <i>et al.</i> 2022</b>        | X                | ✓                | ✓                | ✓                  | X                  | ✓                | ?                | X              | ✓              | ✓                    |
| <b>DEL CASTILO <i>et al.</i> 2022</b> | X                | ✓                | ✓                | ?                  | X                  | ?                | ✓                | X              | ✓              | ✓                    |
| <b>LIU <i>et al.</i> 2022</b>         | X                | ✓                | ✓                | ✓                  | X                  | ✓                | ?                | X              | ✓              | ✓                    |
| <b>MOTTA <i>et al.</i> 2022</b>       | X                | ✓                | X                | ?                  | X                  | ?                | ?                | X              | ✓              | ✓                    |
| <b>TLAIS <i>et al.</i> 2022</b>       | X                | X                | ✓                | X                  | X                  | ?                | ?                | ✓              | ✓              | ✓                    |
| <b>BILLENKAMP <i>et al.</i> 2021</b>  | ✓                | ✓                | ✓                | ✓                  | X                  | ✓                | ?                | ✓              | ✓              | ?                    |
| <b>CASTELLI <i>et al.</i> 2021</b>    | ✓                | ✓                | ✓                | ✓                  | X                  | ✓                | ?                | ✓              | ✓              | ✓                    |
| <b>DING <i>et al.</i> 2021</b>        | X                | ✓                | ✓                | ?                  | X                  | ?                | ?                | X              | ✓              | ✓                    |
| <b>HU <i>et al.</i> 2021</b>          | ✓                | ✓                | ✓                | ✓                  | X                  | ?                | ?                | X              | ✓              | ?                    |
| <b>MESNAGE <i>et al.</i> 2021</b>     | ✓                | ✓                | ✓                | ✓                  | X                  | ?                | ?                | X              | ✓              | ?                    |
| <b>OWAGBORUIAYE,</b>                  | X                | X                | ✓                | ?                  | X                  | ?                | ?                | ?              | ✓              | ✓                    |

*et al. 2021*

|                                                  |   |   |   |   |   |   |   |   |   |   |
|--------------------------------------------------|---|---|---|---|---|---|---|---|---|---|
| <b>GÓMEZ-<br/>GALLEGO <i>et al.</i><br/>2020</b> | X | X | ✓ | ✓ | X | ✓ | ? | ✓ | ✓ | ✓ |
| <b>IORI <i>et al.</i> 2020</b>                   | ✓ | ? | ✓ | ? | X | ? | ? | X | ✓ | ✓ |
| <b>KRAUSE <i>et al.</i> 2020</b>                 | X | ✓ | ✓ | X | X | ? | ? | ✓ | ✓ | ✓ |
| <b>MOTTA <i>et al.</i> 2020</b>                  | X | ✓ | ✓ | ? | X | X | ? | X | ✓ | ✓ |
| <b>MOTTA AND<br/>MORAN, 2020</b>                 | X | ✓ | ✓ | ✓ | X | X | ? | X | ✓ | ✓ |
| <b>RUUSKANEN <i>et al.</i><br/>2020</b>          | X | ✓ | ✓ | ✓ | ✓ | ✓ | ✓ | X | ✓ | ✓ |
| <b>SONG <i>et al.</i> 2020</b>                   | X | ✓ | ✓ | ✓ | ✓ | ✓ | ? | ✓ | ✓ | ✓ |
| <b>SUPPA <i>et al.</i> 2020</b>                  | X | ✓ | ✓ | ✓ | X | ✓ | ? | ? | ✓ | ? |
| <b>TANG <i>et al.</i> 2020</b>                   | X | ✓ | ? | ✓ | X | ? | ? | ✓ | ✓ | ? |
| <b>BILAN <i>et al.</i> 2019</b>                  | X | ✓ | X | ✓ | X | X | X | ✓ | ✓ | ? |
| <b>BLOT <i>et al.</i> 2019</b>                   | ✓ | ✓ | ? | ? | X | ? | X | ✓ | ✓ | ✓ |

|                                      |   |   |   |   |   |   |   |   |   |   |
|--------------------------------------|---|---|---|---|---|---|---|---|---|---|
| <b>BOTE <i>et al.</i> 2019</b>       | X | ✓ | ? | ? | X | ? | ? | ✓ | ✓ | ✓ |
| <b>DECHARTRES <i>et al.</i> 2019</b> | X | ✓ | ✓ | ✓ | ✓ | ✓ | ✓ | ✓ | ✓ | ✓ |
| <b>MESNAGE <i>et al.</i> 2019</b>    | ✓ | ✓ | ✓ | ✓ | ✓ | ✓ | ✓ | ✓ | ✓ | ✓ |
| <b>PÖPPE <i>et al.</i> 2019</b>      | X | X | ✓ | ? | X | X | ? | ✓ | ✓ | ✓ |
| <b>YANG <i>et al.</i> 2019</b>       | X | ✓ | ✓ | ? | X | ? | ? | X | ✓ | ? |
| <b>AITBALI <i>et al.</i> 2018</b>    | X | ✓ | ✓ | ? | X | ? | ? | ✓ | ✓ | ✓ |
| <b>DAI <i>et al.</i> 2018</b>        | X | ✓ | ✓ | ✓ | X | ✓ | ? | X | ✓ | ✓ |
| <b>KITTLE <i>et al.</i> 2018</b>     | X | ? | ✓ | ? | X | X | X | X | ✓ | ? |
| <b>LOZANO <i>et al.</i> 2018</b>     | X | ? | ✓ | ? | ✓ | X | ? | ✓ | ✓ | ✓ |
| <b>MADISON <i>et al.</i> 2018</b>    | X | ✓ | ✓ | ✓ | X | ? | ? | ✓ | ✓ | ? |
| <b>MAO <i>et al.</i> 2018</b>        | X | ✓ | ✓ | ✓ | X | ? | ? | ✓ | ✓ | ✓ |
| <b>MOTTA <i>et al.</i> 2018</b>      | X | ✓ | ✓ | ? | X | ? | ? | X | ✓ | ? |
| <b>NIELSEN <i>et al.</i> 2018</b>    | X | ✓ | ✓ | ✓ | X | ✓ | ? | ✓ | ✓ | ✓ |



|                                     |   |   |   |   |   |   |   |   |   |   |
|-------------------------------------|---|---|---|---|---|---|---|---|---|---|
| <b>ACKERMANN <i>et al.</i> 2014</b> | X | ✓ | ✓ | X | X | X | X | ✓ | ✓ | ? |
| <b>KRÜGER <i>et al.</i> 2013</b>    | X | ✓ | ✓ | ? | X | ? | ? | ✓ | ✓ | ? |
| <b>SHEHATA <i>et al.</i> 2013</b>   | X | X | ✓ | ? | X | X | X | ? | ✓ | ? |

---

**Table S3 (continuation)** Assessment of risk of bias in preclinical animal studies according to the SYRCLE tool.

1 ✓ = Adequate randomization; ? = randomized but no details; x = no evidence of randomization. 2 ✓ = Baseline characteristics given; ? = insufficient baseline characteristics; x = baseline characteristics not given. 3 ✓ = Evidence of adequate concealment of groups; ? = unknown of adequate concealment of groups; x = no evidence of adequate concealment of groups. 4 ✓ = Evidence of random housing of animals; ? = unknown housing arrangement. 5 ✓ = Evidence of caregivers blinded to intervention; x = no evidence of caregivers blinded to intervention. 6 ✓ = Evidence of random selection for assessment; ? = insuive of random selection for assessment; x = no evidence of random selection for assessment. 7 ✓ = Evidence of assessor blinded; ? = unknown of assessor blinded x = no evidence of assessor blinded. 8 ✓ = Explanation of missing animal data; ? = unknown of missing animal data; x = no explanation of missing animal data. 9 ✓ = Free of selective reporting based on methods/results; ? = insuive reporting; x = selective reporting. 10 ✓ = Free of other high bias risk; ? = insufficient data to determine risk of other bias.

| Study                                 | Selection bias 1 | Selection bias 2 | Selection bias 3 | Performance bias 1 | Performance bias 2 | Detection bias 1 | Detection bias 2 | Attrition bias | Reporting bias | Other potential bias |
|---------------------------------------|------------------|------------------|------------------|--------------------|--------------------|------------------|------------------|----------------|----------------|----------------------|
| <b>ALMASRI <i>et al.</i> 2022</b>     | ✓                | ✓                | ✓                | ✓                  | X                  | ✓                | ✓                | X              | ✓              | ✓                    |
| <b>BREDE <i>et al.</i> 2022</b>       | ✓                | ✓                | ✓                | X                  | X                  | X                | ?                | ✓              | ✓              | ✓                    |
| <b>CHEN <i>et al.</i> 2022</b>        | X                | ✓                | ✓                | ✓                  | X                  | ✓                | ?                | X              | ✓              | ✓                    |
| <b>DEL CASTILO <i>et al.</i> 2022</b> | X                | ✓                | ✓                | ?                  | X                  | ?                | ✓                | X              | ✓              | ✓                    |
| <b>LIU <i>et al.</i> 2022</b>         | X                | ✓                | ✓                | ✓                  | X                  | ✓                | ?                | X              | ✓              | ✓                    |
| <b>MOTTA <i>et al.</i> 2022</b>       | X                | ✓                | X                | ?                  | X                  | ?                | ?                | X              | ✓              | ✓                    |
| <b>TLAIS <i>et al.</i> 2022</b>       | X                | X                | ✓                | X                  | X                  | ?                | ?                | ✓              | ✓              | ✓                    |
| <b>BILLENKAMP <i>et al.</i> 2021</b>  | ✓                | ✓                | ✓                | ✓                  | X                  | ✓                | ?                | ✓              | ✓              | ?                    |
| <b>CASTELLI <i>et al.</i> 2021</b>    | ✓                | ✓                | ✓                | ✓                  | X                  | ✓                | ?                | ✓              | ✓              | ✓                    |
| <b>DING <i>et al.</i> 2021</b>        | X                | ✓                | ✓                | ?                  | X                  | ?                | ?                | X              | ✓              | ✓                    |

|                                         |   |   |   |   |   |   |   |   |   |   |
|-----------------------------------------|---|---|---|---|---|---|---|---|---|---|
| <b>HU <i>et al.</i> 2021</b>            | ✓ | ✓ | ✓ | ✓ | X | ? | ? | X | ✓ | ? |
| <b>MESNAGE <i>et al.</i> 2021</b>       | ✓ | ✓ | ✓ | ✓ | X | ? | ? | X | ✓ | ? |
| <b>OWAGBORUIAYE, <i>et al.</i> 2021</b> | X | X | ✓ | ? | X | ? | ? | ? | ✓ | ✓ |
| <b>GÓMEZ-GALLEGO <i>et al.</i> 2020</b> | X | X | ✓ | ✓ | X | ✓ | ? | ✓ | ✓ | ✓ |
| <b>IORI <i>et al.</i> 2020</b>          | ✓ | ? | ✓ | ? | X | ? | ? | X | ✓ | ✓ |
| <b>KRAUSE <i>et al.</i> 2020</b>        | X | ✓ | ✓ | X | X | ? | ? | ✓ | ✓ | ✓ |
| <b>MOTTA <i>et al.</i> 2020</b>         | X | ✓ | ✓ | ? | X | X | ? | X | ✓ | ✓ |
| <b>MOTTA AND MORAN, 2020</b>            | X | ✓ | ✓ | ✓ | X | X | ? | X | ✓ | ✓ |
| <b>RUUSKANEN <i>et al.</i> 2020</b>     | X | ✓ | ✓ | ✓ | ✓ | ✓ | ✓ | X | ✓ | ✓ |
| <b>SONG <i>et al.</i> 2020</b>          | X | ✓ | ✓ | ✓ | ✓ | ✓ | ? | ✓ | ✓ | ✓ |
| <b>SUPPA <i>et al.</i> 2020</b>         | X | ✓ | ✓ | ✓ | X | ✓ | ? | ? | ✓ | ? |
| <b>TANG <i>et al.</i> 2020</b>          | X | ✓ | ? | ✓ | X | ? | ? | ✓ | ✓ | ? |

|                                      |   |   |   |   |   |   |   |   |   |   |
|--------------------------------------|---|---|---|---|---|---|---|---|---|---|
| <b>BILAN <i>et al.</i> 2019</b>      | X | ✓ | X | ✓ | X | X | X | ✓ | ✓ | ? |
| <b>BLOT <i>et al.</i> 2019</b>       | ✓ | ✓ | ? | ? | X | ? | X | ✓ | ✓ | ✓ |
| <b>BOTE <i>et al.</i> 2019</b>       | X | ✓ | ? | ? | X | ? | ? | ✓ | ✓ | ✓ |
| <b>DECHARTRES <i>et al.</i> 2019</b> | X | ✓ | ✓ | ✓ | ✓ | ✓ | ✓ | ✓ | ✓ | ✓ |
| <b>MESNAGE <i>et al.</i> 2019</b>    | ✓ | ✓ | ✓ | ✓ | ✓ | ✓ | ✓ | ✓ | ✓ | ✓ |
| <b>PÖPPE <i>et al.</i> 2019</b>      | X | X | ✓ | ? | X | X | ? | ✓ | ✓ | ✓ |
| <b>YANG <i>et al.</i> 2019</b>       | X | ✓ | ✓ | ? | X | ? | ? | X | ✓ | ? |
| <b>AITBALI <i>et al.</i> 2018</b>    | X | ✓ | ✓ | ? | X | ? | ? | ✓ | ✓ | ✓ |
| <b>DAI <i>et al.</i> 2018</b>        | X | ✓ | ✓ | ✓ | X | ✓ | ? | X | ✓ | ✓ |
| <b>KITTLE <i>et al.</i> 2018</b>     | X | ? | ✓ | ? | X | X | X | X | ✓ | ? |
| <b>LOZANO <i>et al.</i> 2018</b>     | X | ? | ✓ | ? | ✓ | X | ? | ✓ | ✓ | ✓ |
| <b>MADISON <i>et al.</i> 2018</b>    | X | ✓ | ✓ | ✓ | X | ? | ? | ✓ | ✓ | ? |
| <b>MAO <i>et al.</i> 2018</b>        | X | ✓ | ✓ | ✓ | X | ? | ? | ✓ | ✓ | ✓ |

|                                     |   |   |   |   |   |   |   |   |   |   |
|-------------------------------------|---|---|---|---|---|---|---|---|---|---|
| <b>MOTTA <i>et al.</i> 2018</b>     | X | ✓ | ✓ | ? | X | ? | ? | X | ✓ | ? |
| <b>NIELSEN <i>et al.</i> 2018</b>   | X | ✓ | ✓ | ✓ | X | ✓ | ? | ✓ | ✓ | ✓ |
| <b>ACKERMANN <i>et al.</i> 2014</b> | X | ✓ | ✓ | X | X | X | X | ✓ | ✓ | ? |
| <b>KRÜGER <i>et al.</i> 2013</b>    | X | ✓ | ✓ | ? | X | ? | ? | ✓ | ✓ | ? |
| <b>SHEHATA <i>et al.</i> 2013</b>   | X | X | ✓ | ? | X | X | X | ? | ✓ | ? |

---

| Study                                 | Selection bias 1 | Selection bias 2 | Selection bias 3 | Performance bias 1 | Performance bias 2 | Detection bias 1 | Detection bias 2 | Attrition bias | Reporting bias | Other potential bias |
|---------------------------------------|------------------|------------------|------------------|--------------------|--------------------|------------------|------------------|----------------|----------------|----------------------|
| <b>ALMASRI <i>et al.</i> 2022</b>     | ✓                | ✓                | ✓                | ✓                  | X                  | ✓                | ✓                | X              | ✓              | ✓                    |
| <b>BREDE <i>et al.</i> 2022</b>       | ✓                | ✓                | ✓                | X                  | X                  | X                | ?                | ✓              | ✓              | ✓                    |
| <b>CHEN <i>et al.</i> 2022</b>        | X                | ✓                | ✓                | ✓                  | X                  | ✓                | ?                | X              | ✓              | ✓                    |
| <b>DEL CASTILO <i>et al.</i> 2022</b> | X                | ✓                | ✓                | ?                  | X                  | ?                | ✓                | X              | ✓              | ✓                    |
| <b>LIU <i>et al.</i> 2022</b>         | X                | ✓                | ✓                | ✓                  | X                  | ✓                | ?                | X              | ✓              | ✓                    |
| <b>MOTTA <i>et al.</i> 2022</b>       | X                | ✓                | X                | ?                  | X                  | ?                | ?                | X              | ✓              | ✓                    |
| <b>TLAIS <i>et al.</i> 2022</b>       | X                | X                | ✓                | X                  | X                  | ?                | ?                | ✓              | ✓              | ✓                    |
| <b>BILLENKAMP <i>et al.</i> 2021</b>  | ✓                | ✓                | ✓                | ✓                  | X                  | ✓                | ?                | ✓              | ✓              | ?                    |
| <b>CASTELLI <i>et al.</i> 2021</b>    | ✓                | ✓                | ✓                | ✓                  | X                  | ✓                | ?                | ✓              | ✓              | ✓                    |
| <b>DING <i>et al.</i> 2021</b>        | X                | ✓                | ✓                | ?                  | X                  | ?                | ?                | X              | ✓              | ✓                    |

|                                         |   |   |   |   |   |   |   |   |   |   |
|-----------------------------------------|---|---|---|---|---|---|---|---|---|---|
| <b>HU <i>et al.</i> 2021</b>            | ✓ | ✓ | ✓ | ✓ | X | ? | ? | X | ✓ | ? |
| <b>MESNAGE <i>et al.</i> 2021</b>       | ✓ | ✓ | ✓ | ✓ | X | ? | ? | X | ✓ | ? |
| <b>OWAGBORUIAYE, <i>et al.</i> 2021</b> | X | X | ✓ | ? | X | ? | ? | ? | ✓ | ✓ |
| <b>GÓMEZ-GALLEGO <i>et al.</i> 2020</b> | X | X | ✓ | ✓ | X | ✓ | ? | ✓ | ✓ | ✓ |
| <b>IORI <i>et al.</i> 2020</b>          | ✓ | ? | ✓ | ? | X | ? | ? | X | ✓ | ✓ |
| <b>KRAUSE <i>et al.</i> 2020</b>        | X | ✓ | ✓ | X | X | ? | ? | ✓ | ✓ | ✓ |
| <b>MOTTA <i>et al.</i> 2020</b>         | X | ✓ | ✓ | ? | X | X | ? | X | ✓ | ✓ |
| <b>MOTTA AND MORAN, 2020</b>            | X | ✓ | ✓ | ✓ | X | X | ? | X | ✓ | ✓ |
| <b>RUUSKANEN <i>et al.</i> 2020</b>     | X | ✓ | ✓ | ✓ | ✓ | ✓ | ✓ | X | ✓ | ✓ |
| <b>SONG <i>et al.</i> 2020</b>          | X | ✓ | ✓ | ✓ | ✓ | ✓ | ? | ✓ | ✓ | ✓ |
| <b>SUPPA <i>et al.</i> 2020</b>         | X | ✓ | ✓ | ✓ | X | ✓ | ? | ? | ✓ | ? |
| <b>TANG <i>et al.</i> 2020</b>          | X | ✓ | ? | ✓ | X | ? | ? | ✓ | ✓ | ? |

|                                      |   |   |   |   |   |   |   |   |   |   |
|--------------------------------------|---|---|---|---|---|---|---|---|---|---|
| <b>BILAN <i>et al.</i> 2019</b>      | X | ✓ | X | ✓ | X | X | X | ✓ | ✓ | ? |
| <b>BLOT <i>et al.</i> 2019</b>       | ✓ | ✓ | ? | ? | X | ? | X | ✓ | ✓ | ✓ |
| <b>BOTE <i>et al.</i> 2019</b>       | X | ✓ | ? | ? | X | ? | ? | ✓ | ✓ | ✓ |
| <b>DECHARTRES <i>et al.</i> 2019</b> | X | ✓ | ✓ | ✓ | ✓ | ✓ | ✓ | ✓ | ✓ | ✓ |
| <b>MESNAGE <i>et al.</i> 2019</b>    | ✓ | ✓ | ✓ | ✓ | ✓ | ✓ | ✓ | ✓ | ✓ | ✓ |
| <b>PÖPPE <i>et al.</i> 2019</b>      | X | X | ✓ | ? | X | X | ? | ✓ | ✓ | ✓ |
| <b>YANG <i>et al.</i> 2019</b>       | X | ✓ | ✓ | ? | X | ? | ? | X | ✓ | ? |
| <b>AITBALI <i>et al.</i> 2018</b>    | X | ✓ | ✓ | ? | X | ? | ? | ✓ | ✓ | ✓ |
| <b>DAI <i>et al.</i> 2018</b>        | X | ✓ | ✓ | ✓ | X | ✓ | ? | X | ✓ | ✓ |
| <b>KITTLE <i>et al.</i> 2018</b>     | X | ? | ✓ | ? | X | X | X | X | ✓ | ? |
| <b>LOZANO <i>et al.</i> 2018</b>     | X | ? | ✓ | ? | ✓ | X | ? | ✓ | ✓ | ✓ |
| <b>MADISON <i>et al.</i> 2018</b>    | X | ✓ | ✓ | ✓ | X | ? | ? | ✓ | ✓ | ? |
| <b>MAO <i>et al.</i> 2018</b>        | X | ✓ | ✓ | ✓ | X | ? | ? | ✓ | ✓ | ✓ |



|                                     |   |   |   |   |   |   |   |   |   |   |
|-------------------------------------|---|---|---|---|---|---|---|---|---|---|
| <b>MOTTA <i>et al.</i> 2018</b>     | X | ✓ | ✓ | ? | X | ? | ? | X | ✓ | ? |
| <b>NIELSEN <i>et al.</i> 2018</b>   | X | ✓ | ✓ | ✓ | X | ✓ | ? | ✓ | ✓ | ✓ |
| <b>ACKERMANN <i>et al.</i> 2014</b> | X | ✓ | ✓ | X | X | X | X | ✓ | ✓ | ? |
| <b>KRÜGER <i>et al.</i> 2013</b>    | X | ✓ | ✓ | ? | X | ? | ? | ✓ | ✓ | ? |
| <b>SHEHATA <i>et al.</i> 2013</b>   | X | X | ✓ | ? | X | X | X | ? | ✓ | ? |

| <b>Study</b>                          | <b>Selection bias 1</b> | <b>Selection bias 2</b> | <b>Selection bias 3</b> | <b>Performance bias 1</b> | <b>Performance bias 2</b> | <b>Detection bias 1</b> | <b>Detection bias 2</b> | <b>Attrition bias</b> | <b>Reporting bias</b> | <b>Other potential bias</b> |
|---------------------------------------|-------------------------|-------------------------|-------------------------|---------------------------|---------------------------|-------------------------|-------------------------|-----------------------|-----------------------|-----------------------------|
| <b>ALMASRI <i>et al.</i> 2022</b>     | ✓                       | ✓                       | ✓                       | ✓                         | X                         | ✓                       | ✓                       | X                     | ✓                     | ✓                           |
| <b>BREDE <i>et al.</i> 2022</b>       | ✓                       | ✓                       | ✓                       | X                         | X                         | X                       | ?                       | ✓                     | ✓                     | ✓                           |
| <b>CHEN <i>et al.</i> 2022</b>        | X                       | ✓                       | ✓                       | ✓                         | X                         | ✓                       | ?                       | X                     | ✓                     | ✓                           |
| <b>DEL CASTILO <i>et al.</i> 2022</b> | X                       | ✓                       | ✓                       | ?                         | X                         | ?                       | ✓                       | X                     | ✓                     | ✓                           |
| <b>LIU <i>et al.</i> 2022</b>         | X                       | ✓                       | ✓                       | ✓                         | X                         | ✓                       | ?                       | X                     | ✓                     | ✓                           |

|                                         |   |   |   |   |   |   |   |   |   |   |
|-----------------------------------------|---|---|---|---|---|---|---|---|---|---|
| <b>MOTTA <i>et al.</i> 2022</b>         | X | ✓ | X | ? | X | ? | ? | X | ✓ | ✓ |
| <b>TLAIS <i>et al.</i> 2022</b>         | X | X | ✓ | X | X | ? | ? | ✓ | ✓ | ✓ |
| <b>BILLENKAMP <i>et al.</i> 2021</b>    | ✓ | ✓ | ✓ | ✓ | X | ✓ | ? | ✓ | ✓ | ? |
| <b>CASTELLI <i>et al.</i> 2021</b>      | ✓ | ✓ | ✓ | ✓ | X | ✓ | ? | ✓ | ✓ | ✓ |
| <b>DING <i>et al.</i> 2021</b>          | X | ✓ | ✓ | ? | X | ? | ? | X | ✓ | ✓ |
| <b>HU <i>et al.</i> 2021</b>            | ✓ | ✓ | ✓ | ✓ | X | ? | ? | X | ✓ | ? |
| <b>MESNAGE <i>et al.</i> 2021</b>       | ✓ | ✓ | ✓ | ✓ | X | ? | ? | X | ✓ | ? |
| <b>OWAGBORUIAYE, <i>et al.</i> 2021</b> | X | X | ✓ | ? | X | ? | ? | ? | ✓ | ✓ |
| <b>GÓMEZ-GALLEGO <i>et al.</i> 2020</b> | X | X | ✓ | ✓ | X | ✓ | ? | ✓ | ✓ | ✓ |
| <b>IORI <i>et al.</i> 2020</b>          | ✓ | ? | ✓ | ? | X | ? | ? | X | ✓ | ✓ |
| <b>KRAUSE <i>et al.</i> 2020</b>        | X | ✓ | ✓ | X | X | ? | ? | ✓ | ✓ | ✓ |

|                                      |   |   |   |   |   |   |   |   |   |   |
|--------------------------------------|---|---|---|---|---|---|---|---|---|---|
| <b>MOTTA <i>et al.</i> 2020</b>      | X | ✓ | ✓ | ? | X | X | ? | X | ✓ | ✓ |
| <b>MOTTA AND MORAN, 2020</b>         | X | ✓ | ✓ | ✓ | X | X | ? | X | ✓ | ✓ |
| <b>RUUSKANEN <i>et al.</i> 2020</b>  | X | ✓ | ✓ | ✓ | ✓ | ✓ | ✓ | X | ✓ | ✓ |
| <b>SONG <i>et al.</i> 2020</b>       | X | ✓ | ✓ | ✓ | ✓ | ✓ | ? | ✓ | ✓ | ✓ |
| <b>SUPPA <i>et al.</i> 2020</b>      | X | ✓ | ✓ | ✓ | X | ✓ | ? | ? | ✓ | ? |
| <b>TANG <i>et al.</i> 2020</b>       | X | ✓ | ? | ✓ | X | ? | ? | ✓ | ✓ | ? |
| <b>BILAN <i>et al.</i> 2019</b>      | X | ✓ | X | ✓ | X | X | X | ✓ | ✓ | ? |
| <b>BLOT <i>et al.</i> 2019</b>       | ✓ | ✓ | ? | ? | X | ? | X | ✓ | ✓ | ✓ |
| <b>BOTE <i>et al.</i> 2019</b>       | X | ✓ | ? | ? | X | ? | ? | ✓ | ✓ | ✓ |
| <b>DECHARTRES <i>et al.</i> 2019</b> | X | ✓ | ✓ | ✓ | ✓ | ✓ | ✓ | ✓ | ✓ | ✓ |
| <b>MESNAGE <i>et al.</i> 2019</b>    | ✓ | ✓ | ✓ | ✓ | ✓ | ✓ | ✓ | ✓ | ✓ | ✓ |
| <b>PÖPPE <i>et al.</i> 2019</b>      | X | X | ✓ | ? | X | X | ? | ✓ | ✓ | ✓ |
| <b>YANG <i>et al.</i> 2019</b>       | X | ✓ | ✓ | ? | X | ? | ? | X | ✓ | ? |

|                              |   |   |   |   |   |   |   |   |   |   |
|------------------------------|---|---|---|---|---|---|---|---|---|---|
| <b>AITBALI et al. 2018</b>   | X | ✓ | ✓ | ? | X | ? | ? | ✓ | ✓ | ✓ |
| <b>DAI et al. 2018</b>       | X | ✓ | ✓ | ✓ | X | ✓ | ? | X | ✓ | ✓ |
| <b>KITTLE et al. 2018</b>    | X | ? | ✓ | ? | X | X | X | X | ✓ | ? |
| <b>LOZANO et al. 2018</b>    | X | ? | ✓ | ? | ✓ | X | ? | ✓ | ✓ | ✓ |
| <b>MADISON et al. 2018</b>   | X | ✓ | ✓ | ✓ | X | ? | ? | ✓ | ✓ | ? |
| <b>MAO et al. 2018</b>       | X | ✓ | ✓ | ✓ | X | ? | ? | ✓ | ✓ | ✓ |
| <b>MOTTA et al. 2018</b>     | X | ✓ | ✓ | ? | X | ? | ? | X | ✓ | ? |
| <b>NIELSEN et al. 2018</b>   | X | ✓ | ✓ | ✓ | X | ✓ | ? | ✓ | ✓ | ✓ |
| <b>ACKERMANN et al. 2014</b> | X | ✓ | ✓ | X | X | X | X | ✓ | ✓ | ? |
| <b>KRÜGER et al. 2013</b>    | X | ✓ | ✓ | ? | X | ? | ? | ✓ | ✓ | ? |
| <b>SHEHATA et al. 2013</b>   | X | X | ✓ | ? | X | X | X | ? | ✓ | ? |

---
